# Supplementary material for: Simultaneous determination of legacy and emerging per- and polyfluoroalkyl substances in fish by QuEChERS coupled with ultrahigh performance liquid chromatography tandem mass spectrometry
Source: Royal Society of Chemistry journal article supplement (doi:10.1039/c8ay01478g), 2018-01-01
Supplement: c8ay01478g1.pdf [file c8ay01478g1.pdf]

Supporting Information

**Simultaneous determination of legacy and emerging per- and polyfluoroalkyl  
substances in fish by QuEChERS coupled with ultrahigh performance liquid  
chromatography tandem mass spectrometry**

Yan Gao, Qinghe Zhang\*, Xiaomin Li, Xiuqin Li, and Hongmei Li

Division of Chemical Metrology and Analytical Science, National Institute of  
Metrology, Beijing 100029, China

\*Corresponding author

Prof. Qinghe Zhang

Division of Chemical Metrology and Analytical Science

National Institute of Metrology

Beijing 100029, China

Tel: 8610-6452-4705

E-mail: [zhangqh@nim.ac.cn](mailto:zhangqh@nim.ac.cn)

## **Sample collection and preparation**

A sea bream sample (*Pagrosomus major*) was collected from the market for method development, validation and matrix effect evaluation. The fresh fish sample was washed by Milli-Q water first and then dried with blotting paper. After the removal of head, skin, viscera and bones, fish muscle tissue samples were cut into small pieces and then homogenized by a meat mincer at 20000 rpm. Marine fish samples were collected from market of coastal regions in Shandong Province, China. 1-6 fishes of same species from the same site were homogenized as 1 fish composite sample, and 40 fish composite samples were finally prepared. The detailed information of marine fish samples was listed in Table S1.

## **Quality assurance and quality control**

To control background contamination, no fluoropolymer materials were used during sample collection and sample preparation. Equipments for sample collection and sample preparation were rinsed by methanol before use. Solvents and other materials were tested before use.

The method detection limit (MDL) was defined as the concentration exhibiting a signal-to-noise ratio (S/N) of 3 in fish samples and the method quantitation limit (MQL) was determined as the concentration with S/N of 10. Matrix spike recoveries experiment of 3 spiking levels and reference materials (IRMM 427) were used for method validation.

A procedural blank of sample pretreatment was conducted for every 7 samples. For procedure blank, 2 g of milli-q water was used instead of fish samples. The

pretreatment procedures were same with the fish samples. One solution blank of methanol was tested for every 10 injections. PFHpA and 6:2 FTS were detected in the pretreatment and methanol blanks with  $S/N < 3$ .

Table S1. Detailed information of marine fish samples

| Common name                   | Scientific Name             | Number of fish |
|-------------------------------|-----------------------------|----------------|
| Yellow croaker                | Larimichthys                | 1              |
| Yellow croaker                | Larimichthys                | 2              |
| Yellow croaker                | Larimichthys                | 3              |
| Yellow croaker                | Larimichthys                | 4              |
| Yellow croaker                | Larimichthys                | 5              |
| Yellow croaker                | Larimichthys                | 5              |
| Eelpout                       | Zoarces elongatus           | 2              |
| Eelpout                       | Zoarces elongatus           | 2              |
| Eelpout                       | Zoarces elongatus           | 5              |
| Eelpout                       | Zoarces elongatus           | 5              |
| Black seabream                | Sparus macrocephalus        | 1              |
| Black seabream                | Sparus macrocephalus        | 1              |
| Black seabream                | Sparus macrocephalus        | 3              |
| Halibut                       | Hippoglossus stenolepis     | 1              |
| Halibut                       | Hippoglossus stenolepis     | 2              |
| Halibut                       | Hippoglossus stenolepis     | 3              |
| Mullet                        | Sphyraenus                  | 2              |
| Mullet                        | Sphyraenus                  | 4              |
| Japanese Spanish mackerel     | Scomberomorus niphonius     | 2              |
| Japanese Spanish mackerel     | Scomberomorus niphonius     | 3              |
| Tongue sole                   | Cynoglossus semilaevis      | 4              |
| Tongue sole                   | Cynoglossus semilaevis      | 4              |
| Japanese halfbeak             | Hyporhamphus sajori         | 3              |
| Japanese halfbeak             | Hyporhamphus sajori         | 6              |
| Silvery pomfret               | Pampus argenteus            | 3              |
| Silvery pomfret               | Pampus argenteus            | 4              |
| Snakeheaded Fish              | Channa argus                | 3              |
| Snakeheaded Fish              | Channa argus                | 3              |
| Flatfish                      | Cleisthenes herzensteini    | 5              |
| Monkfish                      | Lophius litulon             | 1              |
| Ribbonfish                    | Coilia ectenes Jordan       | 3              |
| Ray                           | Platyrrhina sinensis        | 1              |
| Plaice                        | Cleisthenes herzensteini    | 2              |
| Puffer fishes                 | Tetraodontidae              | 3              |
| Smelt                         | Osmerus mordax              | 1              |
| Pompano                       | Trachinotus ovatus          | 2              |
| Japanese sea perch            | Lateolabrax japonicus       | 1              |
| Turbot                        | Scophthalmus maximus        | 1              |
| Greenfin horse-faced filefish | Thamnaconus septentrionalis | 4              |
| Common hairfin anchovy        | Setipinna tenuifilis        | 4              |

Table S2. Linearity ranges, calibration curves and regression coefficients ( $R^2$ ) of target PFASs

| Compounds   | Calibration curve      | Linearity range | $R^2$  |
|-------------|------------------------|-----------------|--------|
| PFBA        | $y = 34.352x - 3.0050$ | 0.20 - 20 ng/g  | 0.9985 |
| PFPeA       | $y = 0.5649x + 0.4160$ | 0.01 - 20 ng/g  | 0.9987 |
| PFHxA       | $y = 0.6671x + 0.0230$ | 0.02 - 20 ng/g  | 0.9991 |
| PFHpA       | $y = 0.9706x - 0.0308$ | 0.01 - 20 ng/g  | 0.9990 |
| PFOA        | $y = 1.0199x + 0.0099$ | 0.01 - 20 ng/g  | 0.9997 |
| PFNA        | $y = 0.9755x + 0.0221$ | 0.01 - 20 ng/g  | 0.9993 |
| PFDA        | $y = 0.9259x + 0.0362$ | 0.01 - 20 ng/g  | 0.9984 |
| PFUnDA      | $y = 0.9639x + 0.0086$ | 0.01 - 20 ng/g  | 1.0000 |
| PFDoDA      | $y = 0.9637x + 0.0281$ | 0.01 - 20 ng/g  | 0.9990 |
| PFTTrDA     | $y = 0.6154x + 0.0229$ | 0.01 - 20 ng/g  | 0.9980 |
| PFTeDA      | $y = 0.8467x + 0.027$  | 0.01 - 20 ng/g  | 0.9996 |
| PFHxDA      | $y = 0.9622x + 0.0243$ | 0.01 - 20 ng/g  | 0.9997 |
| PFOcDA      | $y = 0.6760x + 0.0121$ | 0.01 - 20 ng/g  | 0.9999 |
| PFBS        | $y = 0.851x + 0.0362$  | 0.01 - 20 ng/g  | 0.9985 |
| PFPeS       | $y = 2.5532x + 0.101$  | 0.01 - 20 ng/g  | 0.9993 |
| PFHxS       | $y = 1.0372x + 0.0529$ | 0.01 - 20 ng/g  | 0.9958 |
| PFHpS       | $y = 0.7463x + 0.0226$ | 0.01 - 20 ng/g  | 0.9989 |
| PFOS        | $y = 1.0083x + 0.0678$ | 0.01 - 20 ng/g  | 0.9985 |
| PFNS        | $y = 0.9685x + 0.0425$ | 0.01 - 20 ng/g  | 0.9991 |
| PFDS        | $y = 0.9696x + 0.0584$ | 0.01 - 20 ng/g  | 0.9983 |
| PFDoS       | $y = 0.0819x + 0.0046$ | 0.02 - 20 ng/g  | 0.9979 |
| FOSA        | $y = 1.3163x + 0.0107$ | 0.01 - 20 ng/g  | 0.9994 |
| N-MeFOSAA   | $y = 1.1579x + 0.0041$ | 0.01 - 20 ng/g  | 0.9999 |
| N-EtFOSAA   | $y = 1.0974x - 0.0164$ | 0.01 - 20 ng/g  | 0.9993 |
| 4:2FTS      | $y = 0.8587x + 0.0109$ | 0.05 - 5 ng/g   | 0.9992 |
| 6:2FTS      | $y = 0.9360x + 0.1198$ | 0.01 - 5 ng/g   | 0.9915 |
| 8:2FTS      | $y = 0.9671x + 0.0164$ | 0.01 - 5 ng/g   | 0.9992 |
| 10:2FTS     | $y = 0.4102x + 0.0051$ | 0.02 - 5 ng/g   | 0.9987 |
| 6:2Cl-PFAES | $y = 1.4922x + 0.0860$ | 0.01 - 20 ng/g  | 0.9973 |
| 8:2Cl-PFAES | $y = 0.6609x + 0.0288$ | 0.01 - 20 ng/g  | 0.9988 |

Table S3. Comparison of MDLs/MQLs and recoveries with previous studies

| Target PFASs                                                                                                                                                                                                                          | Cleanup method | MDLs           | MQLs           | Recoveries     | Ref        |
|---------------------------------------------------------------------------------------------------------------------------------------------------------------------------------------------------------------------------------------|----------------|----------------|----------------|----------------|------------|
| PFBA, PFPeA, PFHxA, PFHpA, PFOA, PFNA, PFDA, PFUnDA, PFDoDA, PFTrDA, PFTeDA, PFHxDA, PFOcDA, PFBS, PFPeS, PFHxS, PFHpS, PFOS, PFNS, PFDS, PFDoS, PFOSA, N-MeFOSAA, N-EtFOSAA, 4:2FTS, 6:2FTS, 8:2FTS, 10:2FTS, 6:2CIPFAES, 8:2CIPFAES | QuEChERS       | 2 -60 pg/g     | 5-200 pg/g     | 84.6%-<br>107% | This study |
| PFBA, PFPeA, PFHxA, PFHpA, PFOA, PFNA, PFDA, PFUnDA, PFDoDA, PFTrDA, PFTeDA, PFBS, PFPeS, PFHxS, PFHpS, PFOS, PFNS, PFDS, PFOSA, N-MeFOSAA, N-EtFOSAA                                                                                 | WAX            | 2-120 pg/g     | 5-300 pg/g     | 76.6%-<br>109% | 27         |
| PFBA, PFPeA, PFHxA, PFHpA, PFOA, PFNA, PFDA, PFUnDA, PFDoDA, PFTrDA, PFTeDA, PFBS, PFPeS, PFHxS, PFHpS, PFOS, PFNS, PFDS, PFHxPA, PFOPA, PFDPA, PFOSA, N-MeFOSA, N-EtFOSA, N-MeFOSE, N-EtFOSE                                         | QuEChERS       |                | 2-13 pg/g      | 88%-107%       | 30         |
| PFOA, PFNA, PFOS                                                                                                                                                                                                                      | QuEChERS       | 0.16-0.38 ng/g | 0.48-1.14 ng/g | 70%-133%       | 32         |

---

|                                                                                                                     |                               |                |                |          |    |
|---------------------------------------------------------------------------------------------------------------------|-------------------------------|----------------|----------------|----------|----|
| PFBS, PFHxS, PFOS, PFOPA, PFHxPA, PFDPA, PFBA, PFPeA,<br>PFHxA, PFHpA, PFOA, PFNA, PFDA, PFOSA                      | WAX                           | 0.2-12.5 ng/g  |                | 29%-117% | 33 |
| PFOA, PFOS                                                                                                          | WAX                           | 0.20-0.47 ng/g | 0.50-0.70 ng/g | 96%-108% | 34 |
| PFHxA, PFHpA, PFOA, PFNA, PFDA, PUnDA, PDoDA,<br>PTrDA, PTeDA, PFBS, PFPeS, PFHxS, PFHpS, PFOS, PFNS,<br>PFDS, PDoS | WAX coupled<br>with Envi-carb |                | 0.02 ng/g      | 68%-113% | 35 |

---

Table S4. Results of reference material IRMM 427 (ng/g ww)

| Compound | Certified<br>/indicative value | Measured value | SD   |
|----------|--------------------------------|----------------|------|
| PFOS     | 17 ±4 <sup>a</sup>             | 19.6           | 0.33 |
| PFDA     | 1.28 ±0.17 <sup>b</sup>        | 1.38           | 0.09 |
| PFUnDA   | 0.74 ±0.20 <sup>b</sup>        | 0.79           | 0.04 |
| PFDoDA   | 0.97 ±0.21 <sup>b</sup>        | 1.00           | 0.02 |
| FOSA     | 1.60 ±0.50 <sup>a</sup>        | 1.58           | 0.05 |
| PFNA     | 0.09 ±0.05 <sup>a</sup>        | 0.09           | 0.01 |
| PFTTrDA  | 0.62 ±0.29 <sup>a</sup>        | 0.78           | 0.01 |
| PFTeDA   | 0.45 ±0.30 <sup>a</sup>        | 0.60           | 0.03 |
| PFHxS    | 0.09 ±0.05 <sup>a</sup>        | 0.08           | 0.01 |

<sup>a</sup> indicative value

<sup>b</sup> certified value



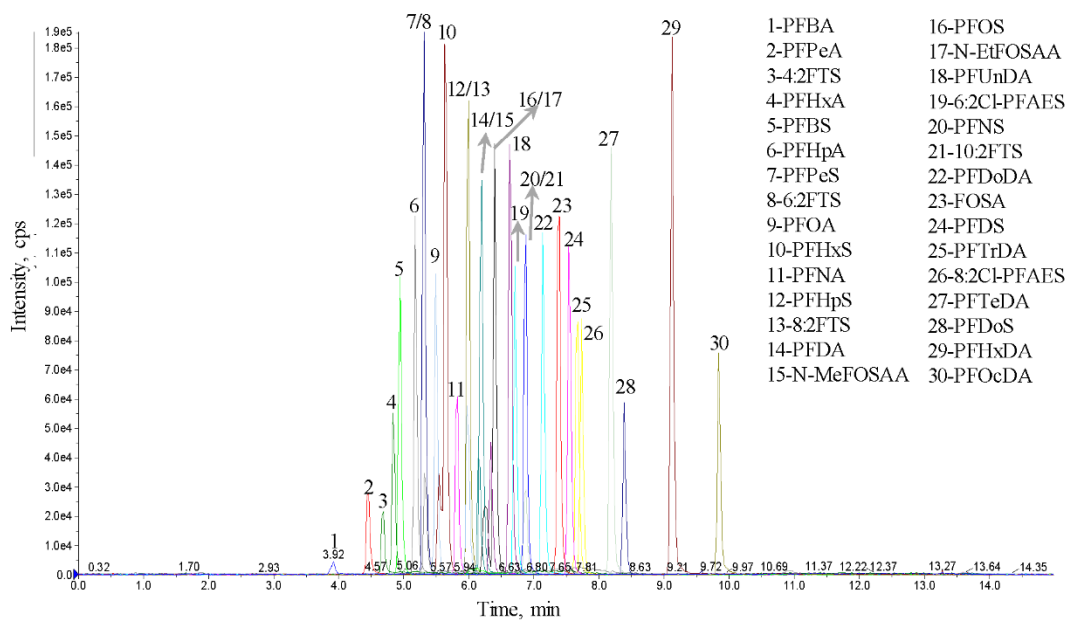

Figure S1. Chromatograms of UHPLC-MS/MS analysis of 30 target PFASs

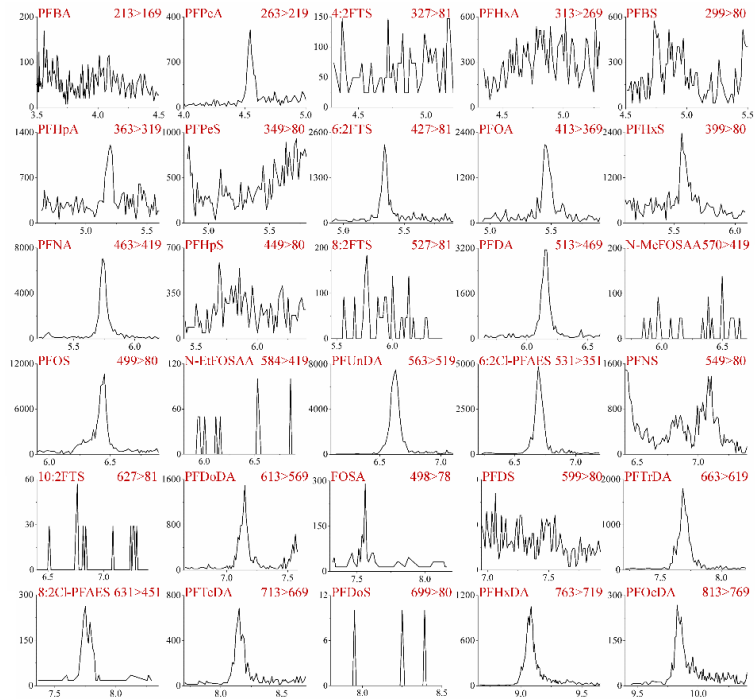

a

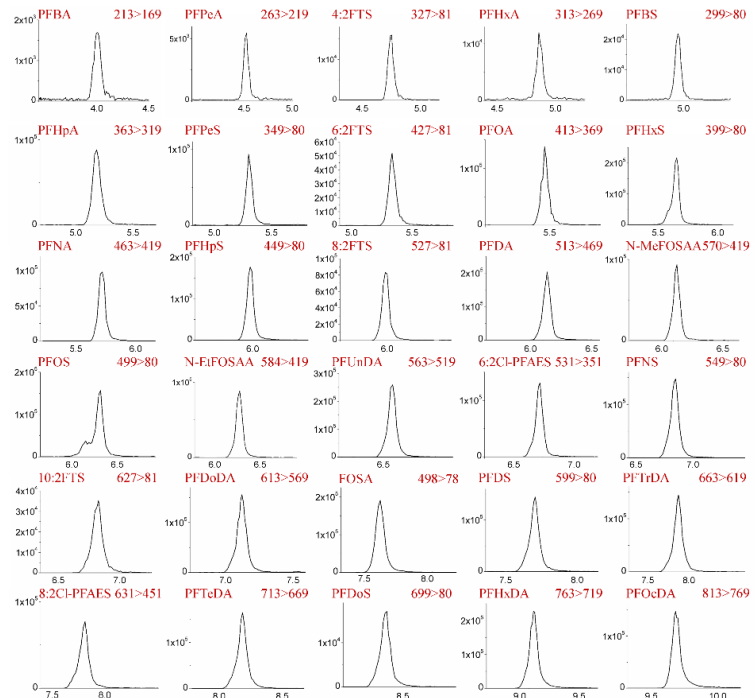

b

Figure S2. Chromatograms of real fish sample (a) and fortified fish sample (b) after QuEChERS procedure

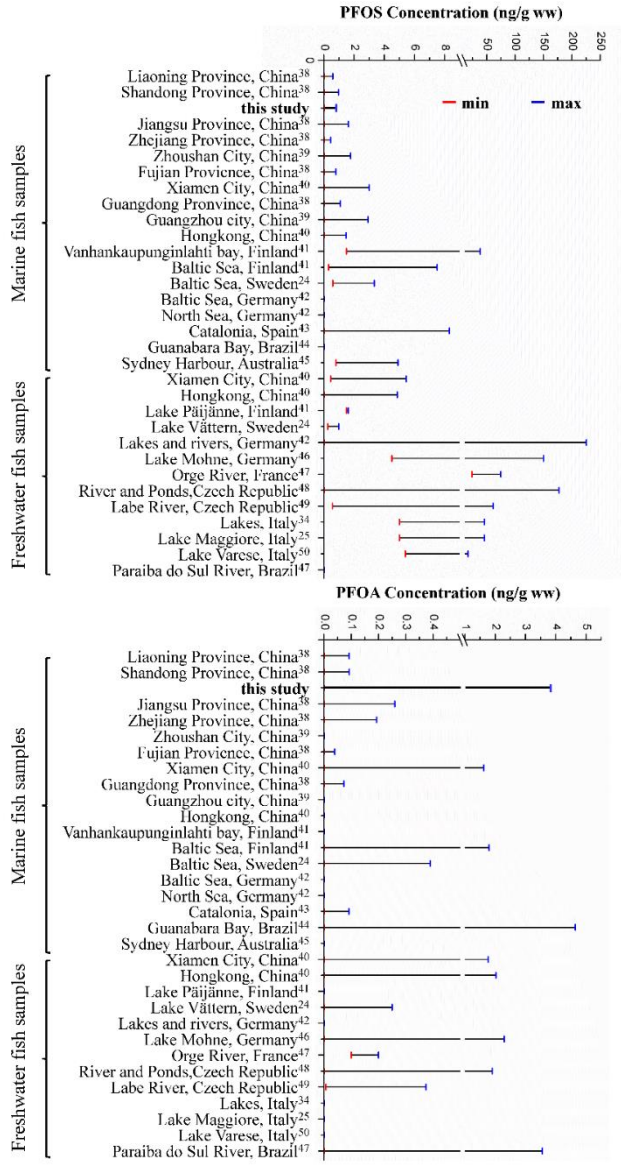

Figure S3. Comparison of PFOS and PFOA concentrations in marine fish samples and freshwater fish samples worldwide
